# Supplementary material for: A highly sensitive flexible humidity sensor based on conductive tape and a carboxymethyl cellulose@graphene composite
Source: Royal Society of Chemistry journal article supplement (doi:10.1039/d3ra05232j), 2023-01-01
Supplement: d3ra05232j1.pdf [file d3ra05232j1.pdf]

## Highly sensitive flexible humidity sensor based on conductive tape and carboxymethyl cellulose@graphene composite

Haoxiang Wang <sup>a</sup>, Chengli Tang <sup>b, c</sup>, Jun Xu <sup>d</sup>

<sup>a</sup> Faculty of Mechanical Engineering, Zhejiang Sci-Tech University, Hangzhou 310000, China

<sup>b</sup> College of Information Science and Engineering, Jiaxing University, Jiaxing, 314000, China

<sup>c</sup> Key Laboratory of Medical Electronics and Digital Health of Zhejiang Province, Jiaxing University, Jiaxing 314001, China

<sup>d</sup> First Affiliated Hospital of Jiaxing University, Jiaxing, 314000, China

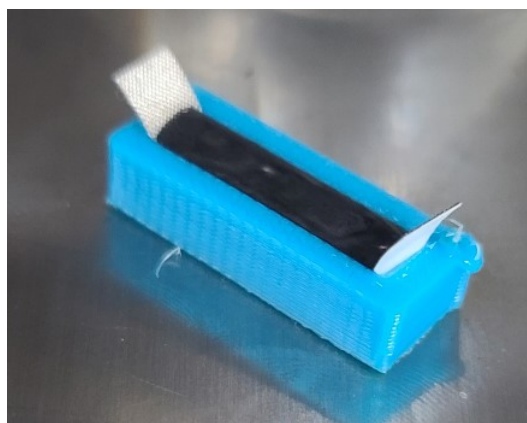

**Fig. S1** Digital photo of the sensor made in the 3-D printed mold.

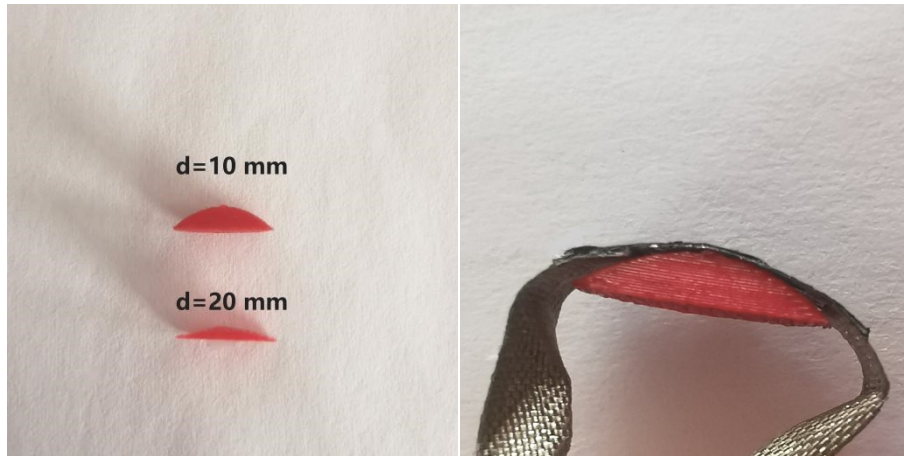

**Fig. S2** (a) Digital photo of the 3D-printed semi-cylindrical plastic molds with diameter of 10 mm and 20 mm,(b) the sensor necked-out on the mold for flexibility test.

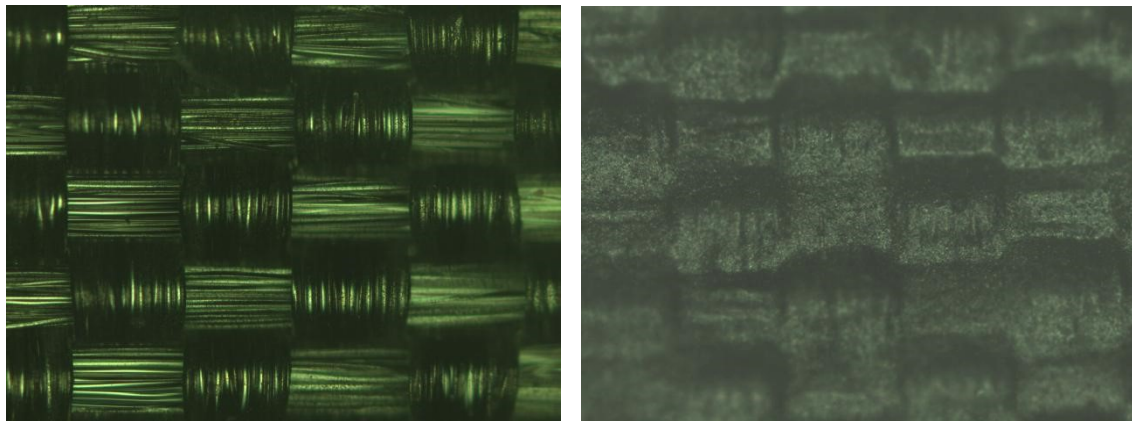

**Fig. S3** The surface morphology of the conductive tape (a) and the CMC@graphene leveled conductive tape (b).

**Fig. S4** Elemental mapping of the conductive tape surface.

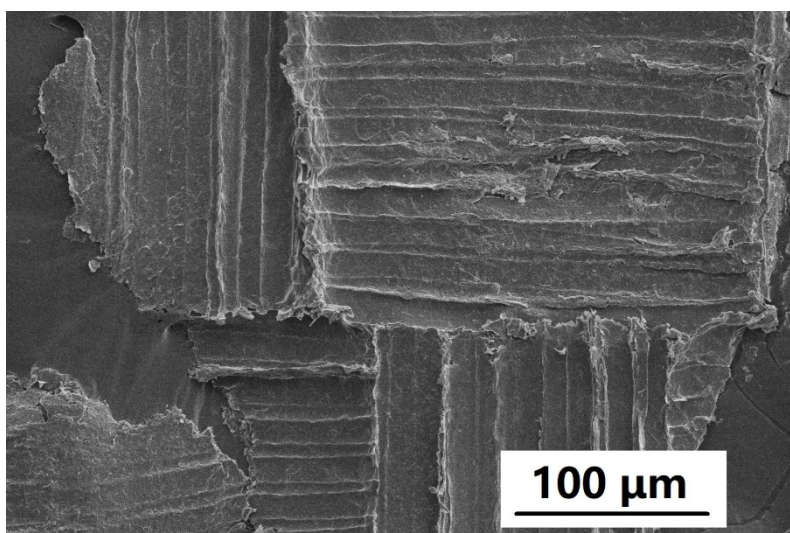

**Fig. S5** SEM image with  $500\times$  magnification.

**Fig. S6** Elemental mapping of the CMC@graphene composite.

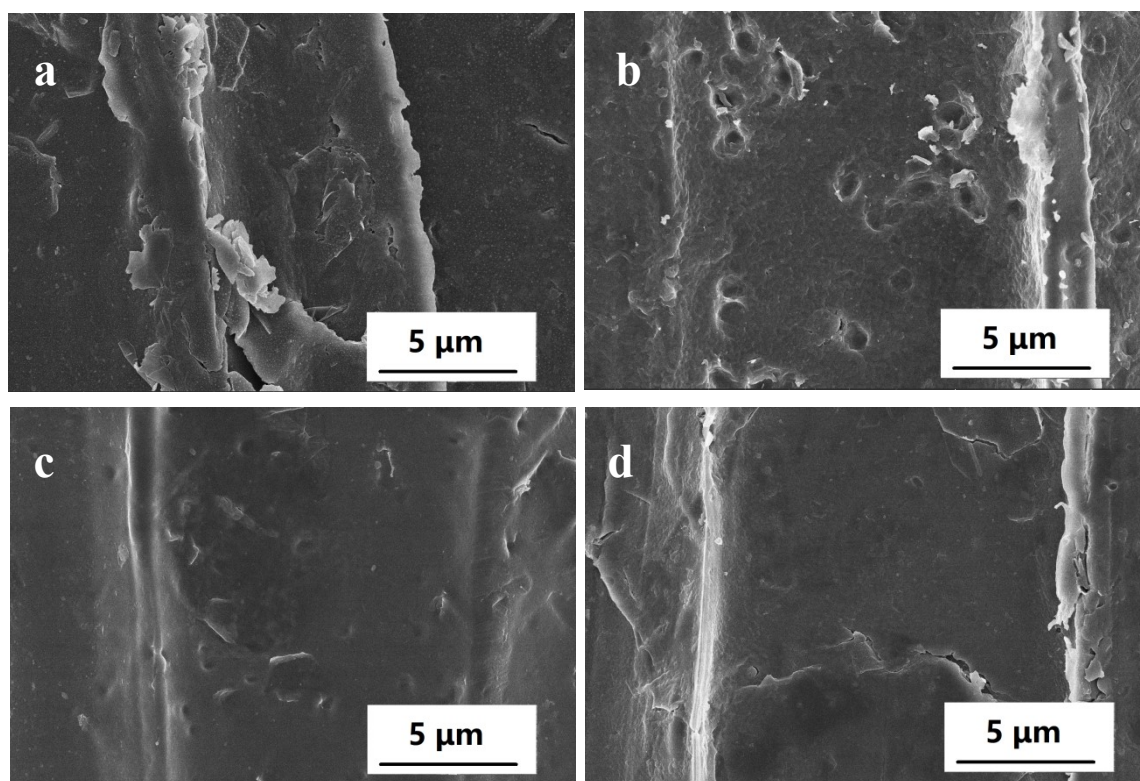

**Fig. S7** SEM images of the CMC composite with graphene addition amount of 0.10 wt % (a), 0.13 wt % (b), 0.19 wt % (c), and 0.22 wt% (d).

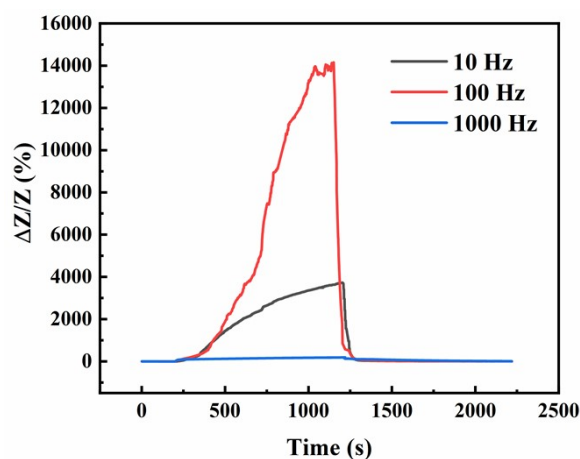

**Fig. S8** Response ( $\Delta Z/Z_0$ ) curves at different frequency of 10 Hz, 100 Hz and 1000 Hz.

(RH from 11% to 95%, voltage: 0.2 V).

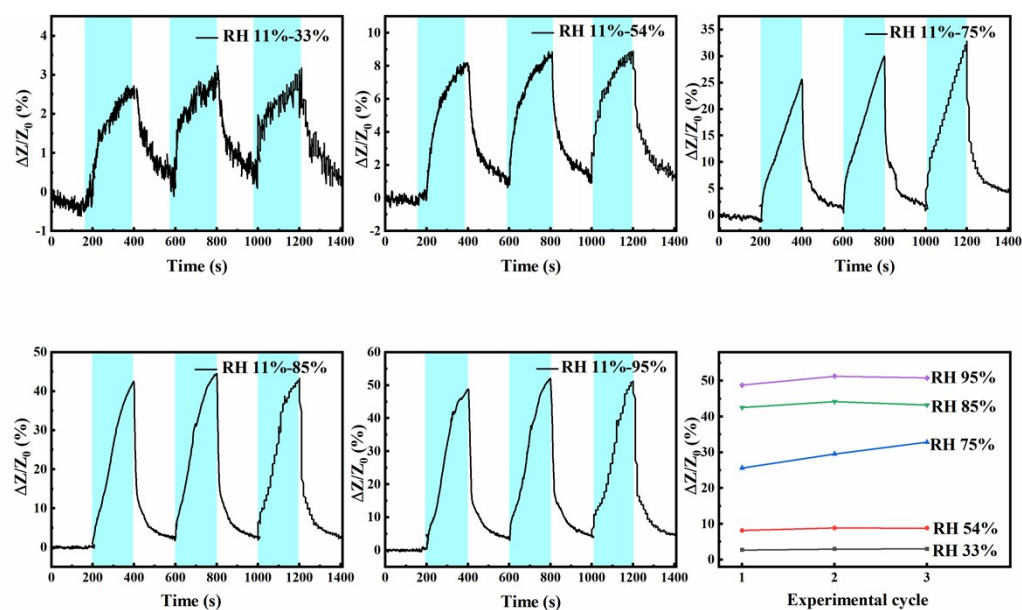

**Fig. S9** Response ( $\Delta Z/Z_0$ ) curves in consecutive sensing cycles (voltage: 0.2 V,

frequency: 100 Hz).

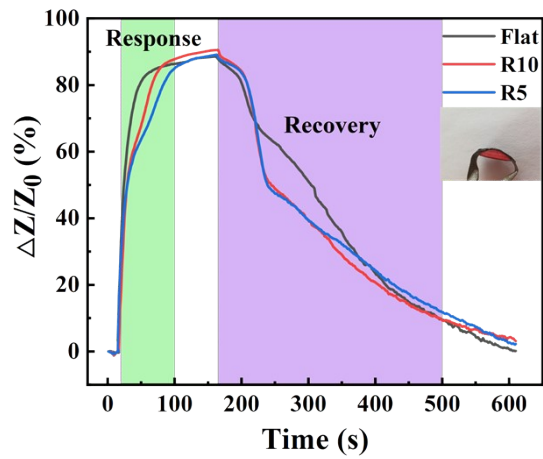

**Fig. S10** Response ( $\Delta Z/Z_0$ ) curves in flat, bending radius of 5 mm and 10 mm (voltage: 0.2 V, frequency: 100 Hz).

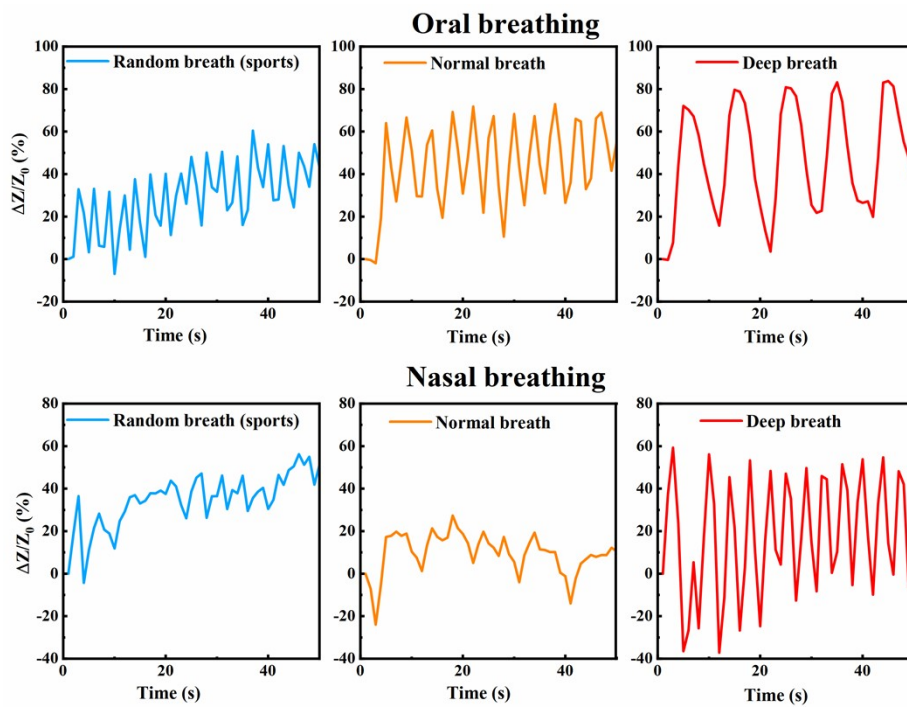

**Fig. S11** Response ( $\Delta Z/Z_0$ ) curves in the nasal breathing and oral breathing test (voltage: 0.2 V, frequency: 100 Hz).
